# Supplementary material
Source: publisher site journal article supplement (https://www.spandidos-publications.com/7467/downloadSupplementary)
Supplement: Supplementary file 1 [file downloadSupplementary]

## Sheet: Sheet1
Table SVIII. The association between DEPP1 expression and clinicopathological features in the TCGA-STAD cohort.
Clinical featuresa		DEPP1 expression		P valueb
		Low	High
Age	<65	121	34	0.177
	≥65	181	35
Gender	Female	111	23	0.679
	Male	195	46
Race category	ASIAN	63	11	0.096
	BLACK OR AFRICAN AMERICAN	11	0
	WHITE	185	53
TNM stage	I	48	5	0.343
	II	89	22
	III	122	28
	IV	30	8
T	T1	19	0	0.071
	T2	66	14
	T3	130	38
	T4	83	17
	Tx	8	0
N	N0	92	19	0.283
	N1	79	18
	N2	65	10
	N3	54	20
	NX	14	2
M	M0	272	58	0.469
	M1	19	6
	MX	15	5
Histologic grade	G1	7	3	<0.05
	G2	122	15
	G3	171	48
	GX	6	3
Primary tumor site	Antrum / Distal	118	20	0.172
	Cardia / Proximal	35	13
	Fundus / Body	108	22
	Gastroesophageal Junction	31	10
	Other	7	3
Barretts esophagus	No	161	32	0.474
	Yes	14	1
Family history of stomach neoplasm	No	222	49	0.507
	Yes	12	4
Reflux history	No	143	32	1
	Yes	32	7
H-pylori infection	No	123	22	0.742
	Yes	15	3
Person neoplasm status	Tumor free	201	44	0.141
	With tumor	57	20
Overall survival status	Alive	197	28	<0.001
	Dead	109	41
Disease progression or reccurrence	Yes	70	28	<0.001
	No	173	22
a Data was obtained from TCGA-STAD cohort.
b Fisher's exact test was applied.
